# Supplementary material
Source: PubMed Central journal article supplement (PMC6558660)
Supplement: NIHMS1025963-supplement-1.pdf [file NIHMS1025963-supplement-1.pdf]

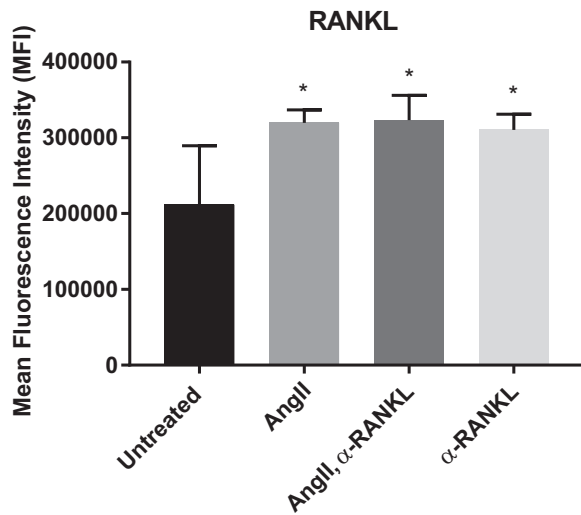

**Supplementary Fig (online only).** Confirmation of angiotensin II (*Ang II*)-induced receptor activator of nuclear factor  $\kappa$ B ligand (*RANKL*) expression in murine vascular smooth muscle cells (MOVAS cells). Flow cytometric analysis of MOVAS cells cultured with *Ang II*, *RANKL*-neutralizing antibody, or both for 48 hours. Cells were analyzed for the expression of *RANKL*. Flow cytometric data are represented as the mean fluorescence intensity  $\pm$  standard deviation of four replicates. \* $P < .05$ .
